## Genetic markers for hypertension – a genetic epidemiological study of 5000 Romanian individuals

R.I. Ursu<sup>1</sup>, P. Iordache<sup>2</sup>, V.E. Radoi<sup>1</sup>, G.F. Ursu<sup>3</sup>, N. Cucu<sup>4</sup>, V. Chirica<sup>5</sup>, D. Iacob<sup>6</sup>, C. Sima<sup>7</sup>, O.D. Dragoi<sup>8</sup>, E. Poenaru<sup>9</sup>, L.C. Bohiltea<sup>1</sup>, A. Manolescu<sup>10</sup>, V. Jinga<sup>9</sup>

<sup>1</sup>University of Medicine and Pharmacy Carol Davila, Medical Genetics, Faculty of General Medicine, Bucharest, Romania; <sup>2</sup>University of Medicine and Pharmacy Carol Davila, Epidemiology, Bucharest, Romania; <sup>3</sup>National Authority of Quality Management in Health, Bucharest, Romania; <sup>4</sup>University of Bucharest, Faculty of Biology, Genetics, Bucharest, Romania; <sup>5</sup>“Mina Minovici” National Institute of Legal Medicine, Bucharest, Romania; <sup>6</sup>“Matei Bals” National Institute for Infectious Diseases, Bucharest, Romania; <sup>7</sup>Clinical Hospital Dr Theodor Burghel, Bucharest, Romania; <sup>8</sup>Fundeni Clinical Institute, Haematology, Bucharest, Romania; <sup>9</sup>University of Medicine and Pharmacy Carol Davila, Bucharest, Romania; <sup>10</sup>Reykjavik University, School of Science and Engineering, Reykjavik, Iceland

**Funding Acknowledgement:** Type of funding source: None

**Background:** During the past decades, genetic research has reached new heights as next generation sequencing has rapidly taken over and genome-wide association studies (GWAS) have brought.

The purpose of the research is to determine high-risk variants (Single-Nucleotide-Variants, SNVs) associated with hypertension (HTA) in the Romanian population.

The current presentation assesses the final results of a 3 part study comprising the first and the largest GWAS on hypertension in Romanians.

**Material:** Methods The total cohort includes a number of 5690 individuals, of which 2190 with hypertension and 3500 healthy controls.

Genetic testing was performed at in Iceland.

A multiple GWAS assay has been performed for the identification of variants associated with hypertension, hypertension risk factors and hypertension comorbidities.

**Results:** Environmental (lifestyle) risk factors, such as smoking, alcohol consumption and coffee consumption, and also pathological risk factors, as are obesity and ageing, were analyzed in association with hypertension. Tissue-specific protein expression, gene function and gene-gene interactions have been analyzed for assessing a possible biological explanation of the association between the identified related variants and HTA. Expres-

sion quantitative trait loci (eQTL) were assessed for variants in the reported locations for a better understanding of their involvement in HTA.

The results of the analysis revealed a number of over 5000 genetic variants statistically correlated with hypertension in the studied cohort, some well documented and in genes known to be involved in hypertension pathophysiology (clusters on chromosomes 1p36, 1q24, 3q24, 4p16, 5q12, 7q36, 12p12, 15q, 17q, 20q12, a.o. or CRNKL1, C19Orf12, CCDC51, C20Orf26, ZNF420, ZNF571, a.o. intragenic variants). Approx. 4100 SNVs were identified in correlation with diabetes mellitus and obesity.

Variants correlated with both hypertension and DM were identified (TBX20, ANK2, a.o. genes). Two other variant clusters ( $p=10^{-4}$ – $10^{-3}$ ) on chromosomes 19 (19q12) and 20 (20p11.21) revealed statistical correlations with both hypertension and obesity.

**Conclusions:** The present study found some important loci and clusters associated with HTA, which might provide insights into the genetic architecture of this pathology.

The validity of these results for the Romanian population need to be confirmed by replication studies.

The current research is part of the EU ProMark, ROMCAN and App-GenEdu projects.
